# Supplementary material
Source: PubMed Central journal article supplement (PMC2836625)
Supplement: 0910715107_pnas.0910715107_SI.pdf [file 0910715107_pnas.0910715107_SI.pdf]

# Supporting Information

Hale et al. 10.1073/pnas.0910715107

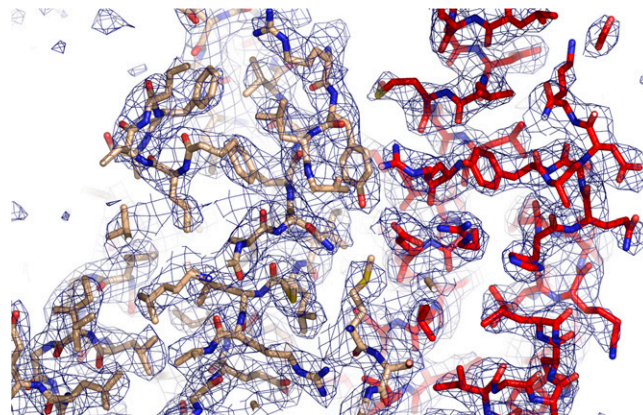

**Fig. S1.** Representative example of  $2F_o-F_c$  electron density (contoured at  $1\sigma$ ) for the ED: $\beta$ -iSH2 complex.

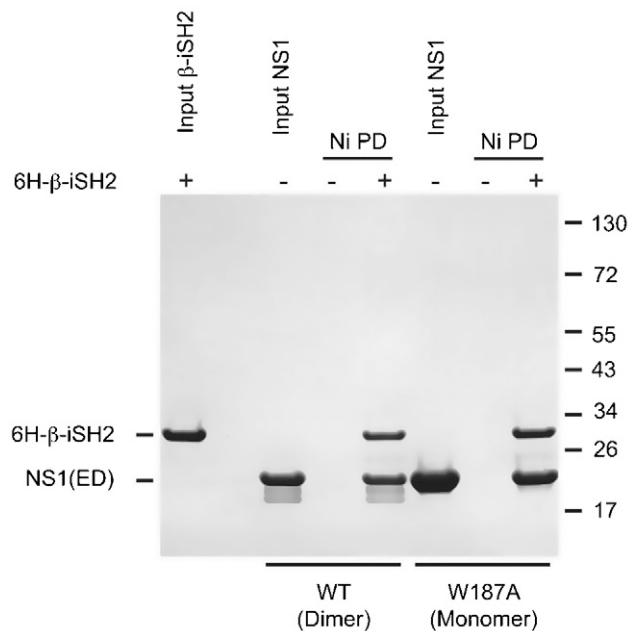

**Fig. S2.** The NS1 ED-W187A (monomeric) mutant binds  $\beta$ -iSH2. 6H-tagged  $\beta$ -iSH2 was expressed and purified as described previously (1). Untagged PR8/NS1 EDs (WT and W187A) were purified as for the Alb/NS1 ED (2), and confirmed to be dimeric (WT) or monomeric (W187A) by analytical gel filtration (2). Ni-NTA pull-downs (PD) were performed after individually mixing the purified ED proteins with 6H- $\beta$ -iSH2, and were analyzed by SDS-PAGE followed by Coomassie Blue staining. As shown in the figure, both WT and W187A ED proteins were efficiently precipitated with  $\beta$ -iSH2. Neither ED protein was precipitated in the absence of  $\beta$ -iSH2. Molecular weight markers (kDa) are shown to the right.

- Hale BG, Batty IH, Downes CP, Randall RE (2008) Binding of influenza A virus NS1 protein to the inter-SH2 domain of p85 suggests a novel mechanism for phosphoinositide 3-kinase activation. *J Biol Chem* 283(3):1372–1380.
- Hale BG, Barclay WS, Randall RE, Russell RJ (2008) Structure of an avian influenza A virus NS1 protein effector domain. *Virology* 378(1):1–5.
